# Supplementary material for: FES2014 global ocean tide atlas: design and performance
Source: Copernicus journal article supplement (doi:10.5194/os-17-615-2021), 2021-05-05
Supplement: Supplementary file 1 [file os-17-615-2021-supplement.pdf]

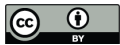

*Supplement of*

## **FES2014 global ocean tide atlas: design and performance**

**Florent H. Lyard et al.**

*Correspondence to:* Florent H. Lyard ([florent.lyard@legos.obs-mip.fr](mailto:florent.lyard@legos.obs-mip.fr))

The copyright of individual parts of the supplement might differ from the article licence.

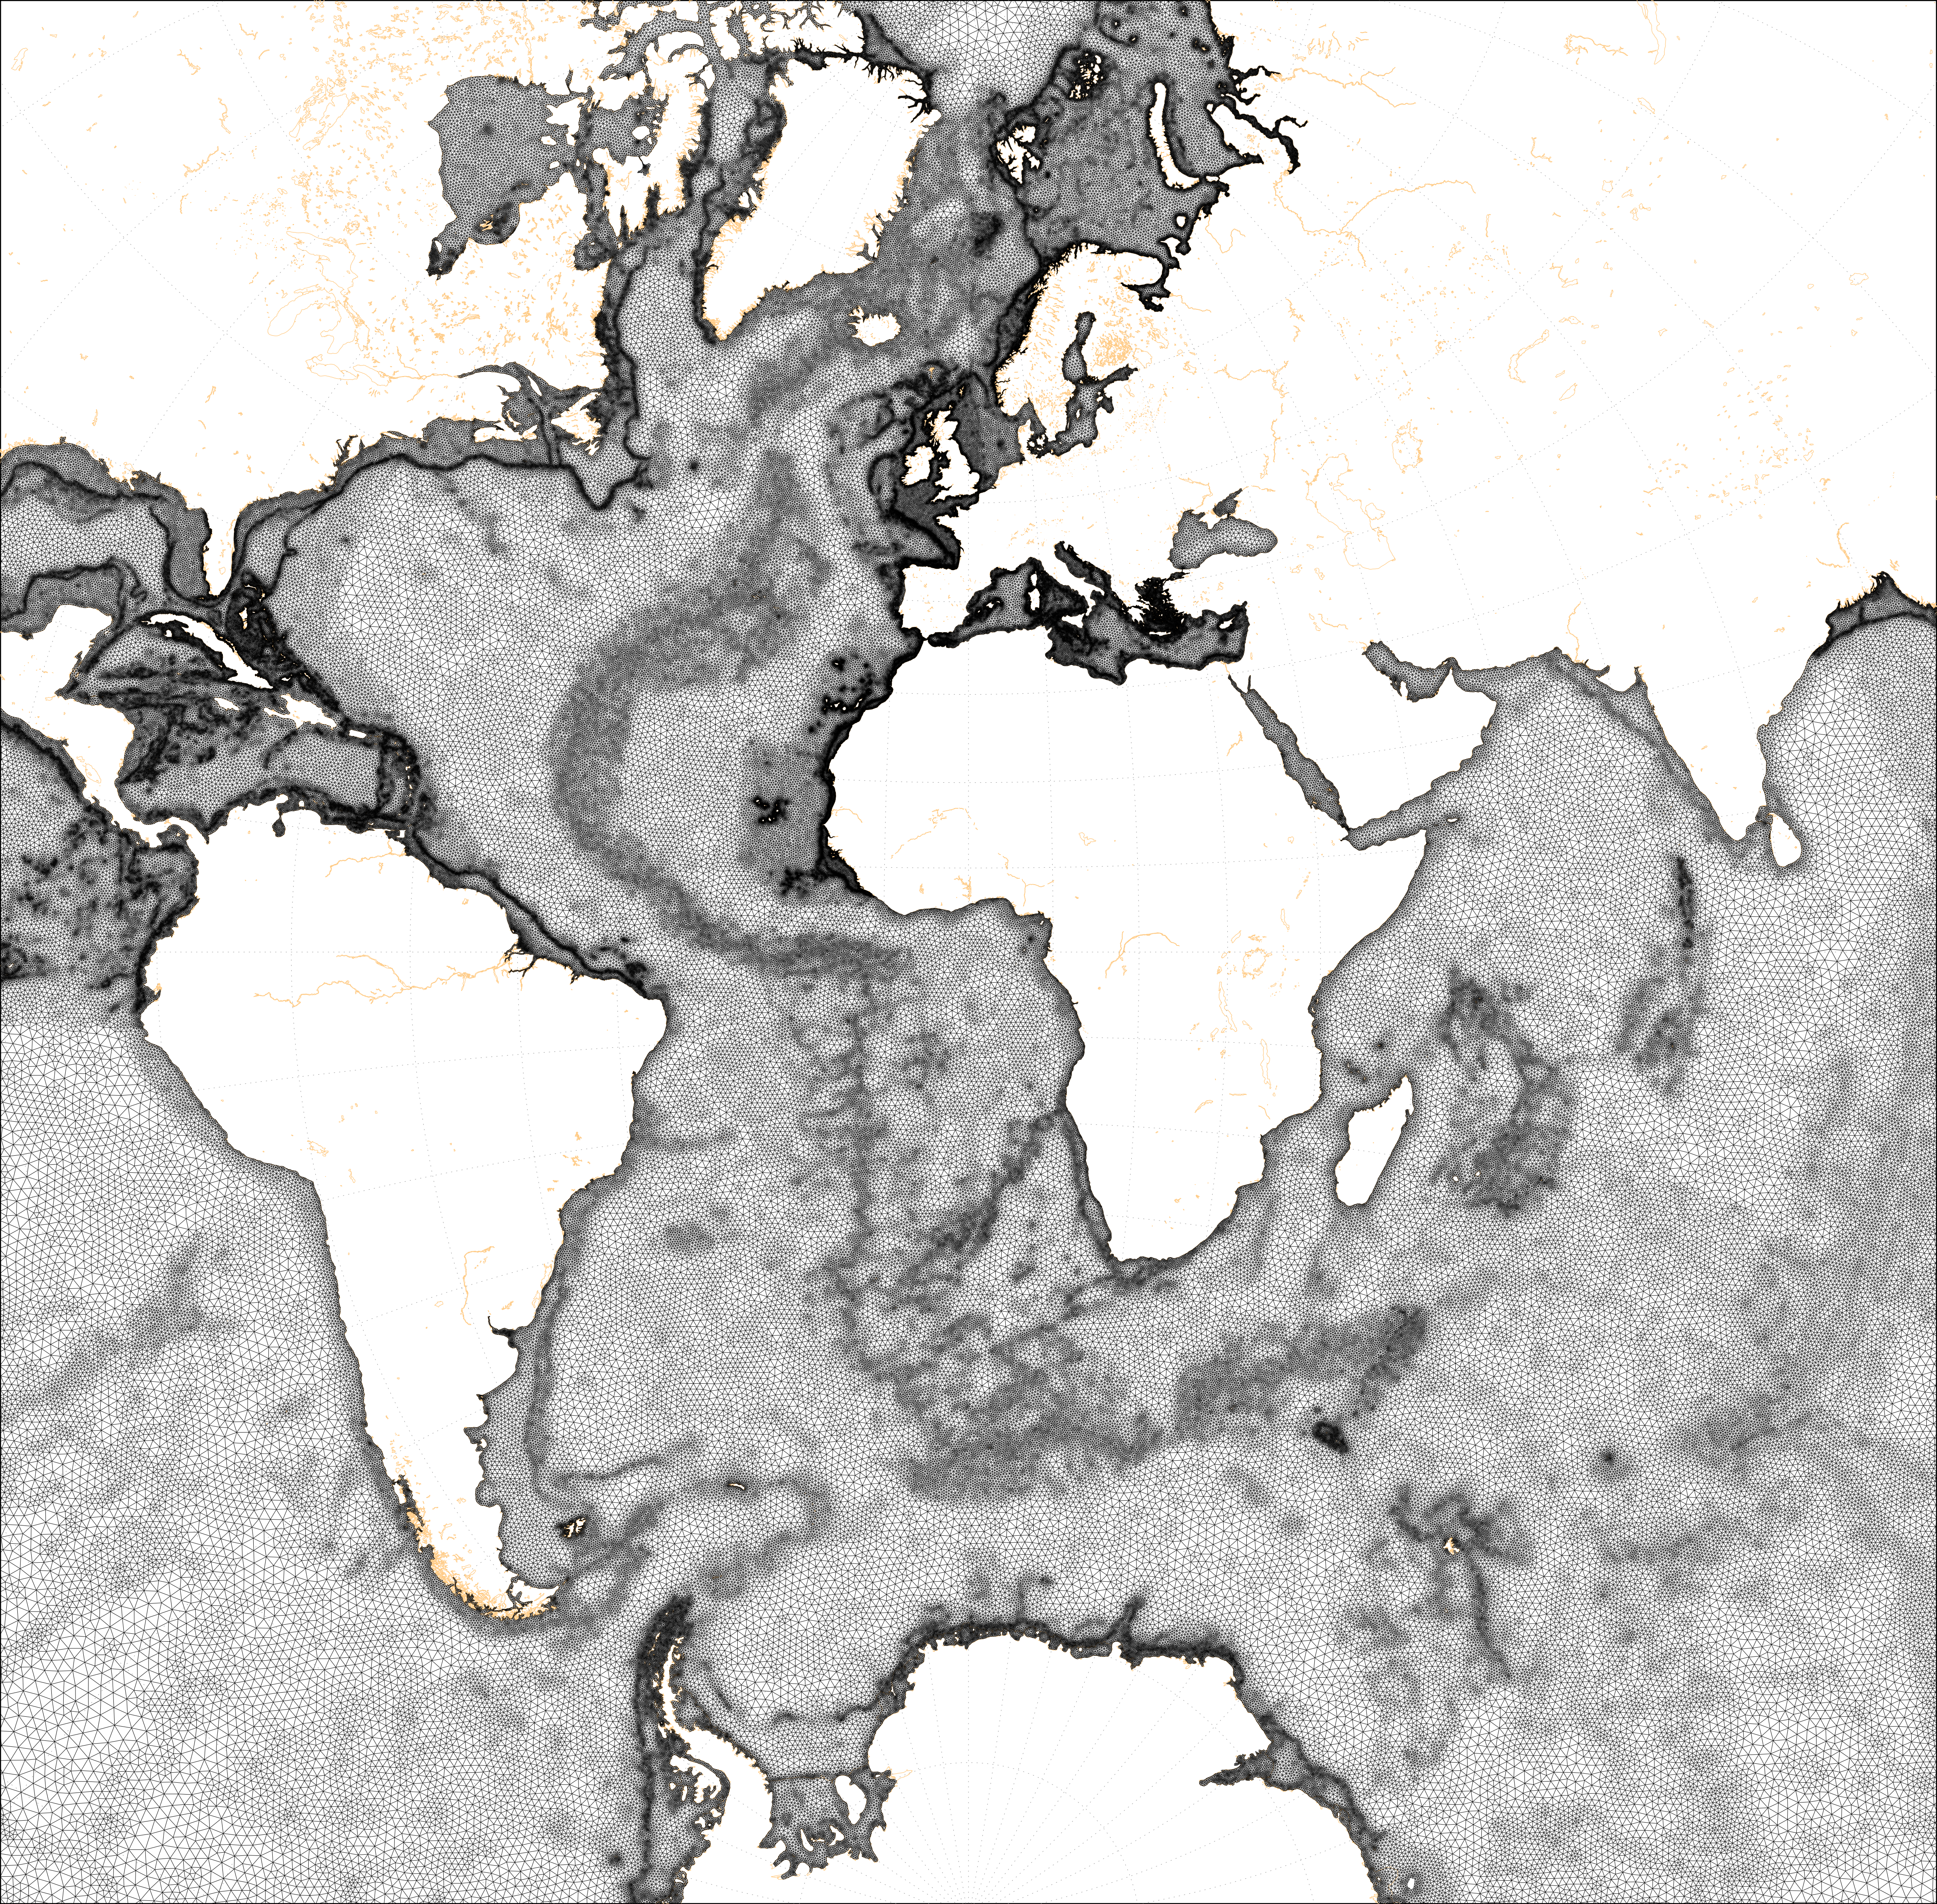

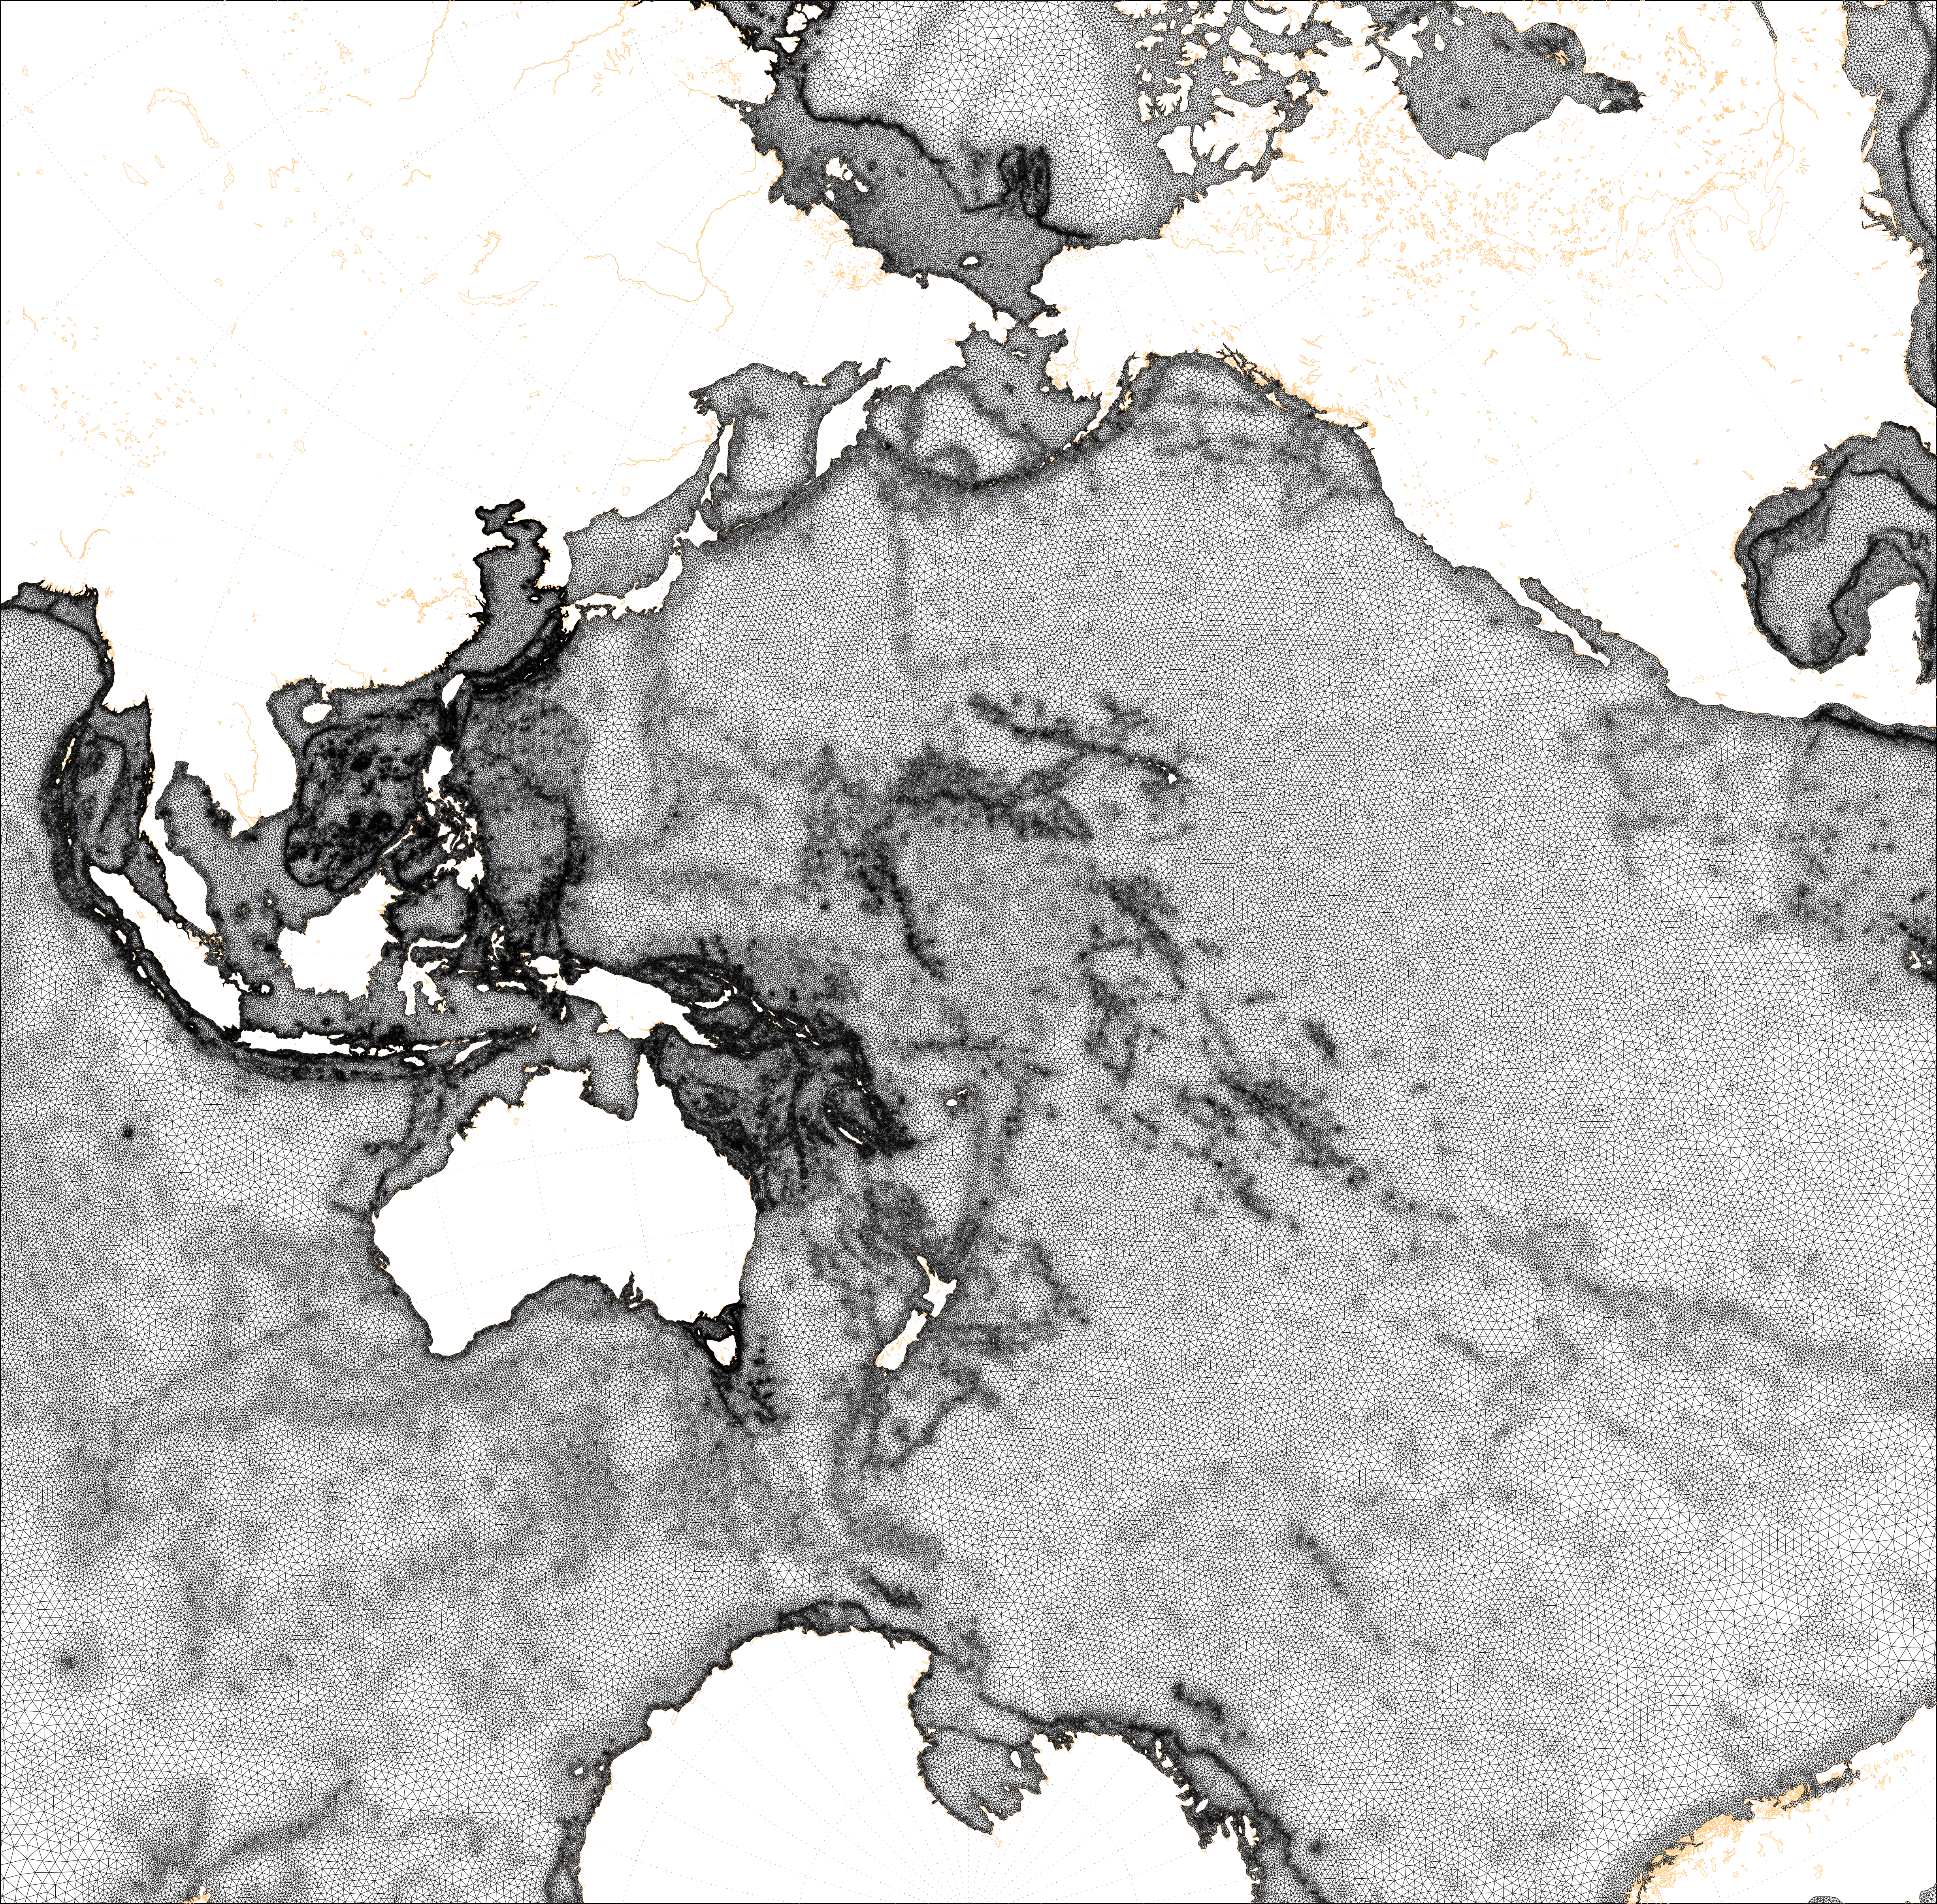

FES2014 finite element mesh with a stereographic projection centered on 0°N 180°E. Mesh details can be displayed by zooming in.
